# Supplementary material for: Effects of constituent ions of a phosphonium-based ionic liquid on molecular organization of H2O as probed by 1-propanol: tetrabutylphosphonium and trifluoroacetate ions
Source: Royal Society of Chemistry journal article supplement (doi:10.1039/c5cp02329g), 2015-01-01
Supplement: c5cp02329g1.xlsx [file c5cp02329g1.xlsx]

## Sheet: 1P-H2O(binary)
xS0=0(binary)
x1P	HE1P (J mol-1)
0.0032528	-10139
0.0064845	-9778.28
0.00969532	-9550.6
0.0128854	-9263.58
0.0160551	-8706.74
0.0192044	-8515.51
0.0223337	-8016.59
0.025443	-7562.9
0.0285327	-7171.3
0.0316028	-6732.14
0.0346536	-6155.65
0.0376852	-5743.31
0.0406978	-5141.34
0.0436916	-4597.88
0.0466668	-4083.25
0.0496235	-3488.45
0.052562	-2991.98
0.0554823	-2441.38
0.0583847	-1938.58
0.0612693	-1485.47
0.0641363	-1126.12
0.0669858	-772.74
0.069818	-491.886
0.0726331	-251.575
0.0754312	-56.4831
0.0782125	99.1926
0.0809771	226.006
0.0837251	332.827
0.0864568	425.221
0.0891722	499.842
0.0918715	559.482
0.0945549	616.305
0.0972225	383.249
0.0998743	674.397
0.102511	728.324
0.105132	770.122
0.107737	779.007
0.110328	812.465
0.112903	820.699
0.115464	848.127

## Sheet: P4444Cl
P4444Cl	xS0=0.00125		xS0=0.00250		xS0=0.00501		xS0=0.0100		xS0=0.0110
	x1P	HE1P (J mol-1)	x1P	HE1P (J mol-1)	x1P	HE1P (J mol-1)	x1P	HE1P (J mol-1)	x1P	HE1P (J mol-1)
	0.0030874	-9454.82	0.00309725	-8463.94	0.00330481	-7496.78	0.00373801	-4895.89	0.00360003	-4226.83
	0.00615579	-9241.12	0.00617537	-8629.37	0.00658785	-7210.72	0.00744818	-4339.62	0.00717423	-3778.98
	0.00920535	-8929.73	0.00923455	-8093.75	0.00984934	-6720.7	0.0111308	-3808.32	0.0107229	-3186.06
	0.0122363	-8497.59	0.0122749	-7967.21	0.0130895	-6418.05	0.0147862	-3235.93	0.0142463	-2722.51
	0.0152487	-8322.12	0.0152967	-7453.12	0.0163085	-5791.01	0.0184147	-2692.89	0.0177446	-2194.82
	0.0182428	-7695.89	0.0183001	-7138.01	0.0195066	-5422.74	0.0220166	-2188.58	0.0212182	-1759.72
	0.0212187	-7471.44	0.0212852	-6646.14	0.0226839	-4797.88	0.0255921	-1687.32	0.0246674	-1308.77
	0.0241767	-6896.29	0.0242522	-6210.48	0.0258407	-4394.45	0.0291416	-1266.02	0.0280923	-941.064
	0.0271168	-6554.71	0.0272013	-5757.28	0.0289772	-3777.62	0.0326653	-863.945	0.0314933	-606.35
	0.0300393	-6087.46	0.0301325	-5268.36	0.0320936	-3323.5	0.0361635	-539.185	0.0348705	-319.716
	0.0329443	-5587.35	0.0330462	-4782.21	0.03519	-2789.22	0.0396365	-247.165	0.0382242	-75.6616
	0.0358319	-4965.97	0.0359424	-4231.59	0.0382667	-2327.58	0.0430846	-13.8723	0.0415548	126.833
	0.0387023	-4568.67	0.0388214	-3739.95	0.0413238	-1870.55	0.046508	183.92	0.0448623	301.631
	0.0415557	-3948.71	0.0416832	-3204.83	0.0443615	-1486.68	0.049907	350.462	0.0481471	434.652
	0.0443922	-3505.94	0.0445279	-2738.92	0.04738	-1111.45	0.0532818	475.262	0.0514094	568.072
	0.0472119	-2950.59	0.0473559	-2249.84	0.0503796	-799.171	0.0566328	587.439	0.0546494	654.072
	0.0500151	-2492.07	0.0501672	-1855.06	0.0533603	-531.54	0.0599601	672.769	0.0578673	723.992
	0.0528018	-2033.54	0.0529619	-1439.35	0.0563223	-299.243	0.063264	747.807	0.0610634	794.594
	0.0555722	-1609.43	0.0557402	-1115.16	0.0592659	-108.3	0.0665448	799.917	0.0642379	856.44
	0.0583265	-1236.54	0.0585023	-800.642	0.0621912	58.5225	0.0698027	851.977	0.067391	896.732
	0.0610647	-904.037	0.0612482	-549.074	0.0650983	198.853	0.0730379	885.283	0.0705229	937.339
	0.0637871	-630.656	0.0639782	-322.892	0.0679875	310.871	0.0762507	923.382	0.0736339	955.883
	0.0664937	-381.603	0.0666924	-98.939	0.0708589	413.423	0.0794413	950.071	0.0767241	984.562
	0.0691847	-181.46	0.0693908	35.1289	0.0737126	482.885	0.08261	958.912	0.0797937	995.476
	0.0718603	-10.5243	0.0720737	161.662	0.0765488	556.738	0.0857569	946.777	0.082843	1006.99
	0.0745205	131.625	0.0747412	274.223	0.0793678	600.986	0.0888822	981.093	0.0858722	1008.81
	0.0771655	249.357	0.0773934	367.218	0.0821695	682.076	0.0919863	1011.02	0.0888814	1014.73
	0.0797954	349.872	0.0800304	443.405	0.0849543	710.879	0.0950693	995.771	0.0918709	1015.87
	0.0824104	427.586	0.0826524	509.765	0.0877222	765.238	0.0981315	1018.27	0.0948408	1010.29
	0.0850105	507.933	0.0852595	573.982	0.0904735	772.96	0.101173	997.336	0.0977914	1014.3
	0.087596	558.537	0.0878518	615.099	0.0932081	810.796	0.104194	1019.67	0.100723	1002.4
	0.0901669	619.76	0.0904294	666.39	0.0959264	826.077	0.107195	999.232	0.103635	1009.37
	0.0927234	655.368	0.0929926	693.01	0.0986285	844.041	0.110176	1015.46	0.106529	995.011
	0.0952655	695.923	0.0955413	732.163	0.101314	854.412	0.113137	994.532	0.109404	1004.93
	0.0977934	734.459	0.0980757	750.59	0.103984	869.22	0.116078	1003.31	0.11226	982.376
	0.100307	767.597	0.100596	790.199	0.106639	888.753	0.119	985.075	0.115099	992.671
	0.102807	795.32	0.103102	797.116	0.109277	881.868	0.121902	987.225	0.117919	973.973
	0.105293	814.614	0.105595	829.856	0.1119	909.433	0.124786	977.545	0.120721	984.332
	0.107765	842.439	0.108073	836.222	0.114508	893.024	0.12765	967.756	0.123505	963.719
	0.110224	832.142	0.110538	858.296	0.1171	916.505	0.130496	972.759	0.126272	966.492

## Sheet: NaCF3COO
NaCF3COO	xS0=0.0050		xS0=0.0100		xS0=0.0250		xS0=0.0400		xS0=0.0550
	x1P	HE1P (J mol-1)	x1P	HE1P (J mol-1)	x1P	HE1P (J mol-1)	x1P	HE1P (J mol-1)	x1P	HE1P (J mol-1)
	0.0030737	-8970.28	0.00331698	-8774.99	0.00324593	-6599.18	0.0034477	-4724.37	0.00357648	-2925.37
	0.00612857	-9151.59	0.00661204	-8368.91	0.00647086	-6488.49	0.0068717	-4366.45	0.00712747	-2412.12
	0.00916477	-8704.51	0.00988537	-8112.95	0.00967499	-5950.59	0.0102723	-3814.67	0.0106532	-1903.07
	0.0121825	-8573.54	0.0131372	-7591.67	0.0128585	-5610.43	0.0136496	-3313.51	0.0141541	-1440.49
	0.0151819	-8122.75	0.0163678	-7176.88	0.0160216	-5065.06	0.017004	-2726.73	0.0176302	-994.671
	0.0181631	-7756.56	0.0195772	-6701.4	0.0191646	-4569.27	0.0203356	-2251.36	0.0210819	-648.264
	0.0211263	-7270.84	0.0227658	-6278.72	0.0222875	-4078.73	0.0236448	-1720.52	0.0245094	-380.757
	0.0240717	-6968.39	0.0259337	-5734.93	0.0253906	-3501.04	0.0269316	-1302.17	0.027913	-208.117
	0.0269994	-6375.64	0.0290812	-5110.55	0.028474	-2965.67	0.0301964	-938.551	0.031293	-99.7367
	0.0299096	-6011.44	0.0322083	-4635.97	0.031538	-2434.19	0.0334394	-665.363	0.0346495	-39.6033
	0.0328025	-5530.92	0.0353154	-3997.36	0.0345827	-1966.61	0.0366607	-456.591	0.0379829	-12.2355
	0.0356782	-4972.29	0.0384026	-3430.27	0.0376084	-1527.6	0.0398607	-313.173	0.0412933	0.781609
	0.0385368	-4462.64	0.0414701	-2806.63	0.0406151	-1174.14	0.0430394	-205.634	0.044581	5.34227
	0.0413785	-3925.05	0.0445181	-2321.06	0.0436031	-874.289	0.0461972	-131.077	0.0478462	5.22116
	0.0442034	-3439.03	0.0475468	-1778.24	0.0465726	-643.988	0.0493342	-78.5107	0.0510892	3.89617
	0.0470118	-2859.72	0.0505563	-1382.5	0.0495237	-451.114	0.0524507	-37.4533	0.0543101	1.54012
	0.0498037	-2418.94	0.0535469	-996.688	0.0524565	-312.826	0.0555467	-6.5843	0.0575093	1.37971
	0.0525793	-1928.48	0.0565187	-709.03	0.0553714	-192.85	0.0586226	17.3738	0.0606869	2.19689
	0.0553387	-1534.08	0.0594719	-465.308	0.0582683	-104.169	0.0616786	37.7603	0.0638431	2.99286
	0.0580821	-1151.2	0.0624067	-277.618	0.0611475	-32.0674	0.0647147	52.6577	0.0669783	0.0276339
	0.0608096	-866.396	0.0653232	-121.465	0.0640092	28.124	0.0677313	69.5335	0.0700924	-4.8645
	0.0635213	-594.311	0.0682216	1.52118	0.0668535	76.5616	0.0707285	79.4877	0.0731859	-6.87646
	0.0662175	-383.225	0.0711021	100.996	0.0696805	122.033	0.0737065	94.2163	0.0762588	-3.96359
	0.0688981	-199.189	0.0739648	188.757	0.0724905	161.473	0.0766654	103.689	0.0793115	0.399986
	0.0715635	-48.3382	0.07681	249.962	0.0752836	196	0.0796055	119.625	0.082344	6.9042
	0.0742136	85.1078	0.0796377	316.042	0.0780598	228.684	0.0825269	127.837	0.0853566	14.3892
	0.0768486	212.261	0.0824481	356.905	0.0808195	250.712	0.0854299	142.749	0.0883495	22.0862
	0.0794686	327.957	0.0852415	391.349	0.0835627	273.832	0.0883145	151.056	0.0913229	29.8857
	0.0820739	429.276	0.0880178	437.764	0.0862895	289.642	0.091181	161.075	0.0942769	40.0543
	0.0846644	500.21	0.0907774	453.498	0.0890002	311.63	0.0940296	169.254	0.0972118	48.8447
	0.0872403	542.983	0.0935204	501.415	0.0916949	320.807	0.0968603	180.491	0.100128	60.6021
	0.0898018	585.394	0.0962468	518.968	0.0943736	342.924	0.0996734	189.034	0.103025	70.9859
	0.0923489	607.968	0.0989569	560.227	0.0970366	343.583	0.102469	194.837	0.105904	80.4197
	0.0948819	642.007	0.101651	569.957	0.099684	366.204	0.105247	210.514	0.108764	89.7689
	0.0974007	643.227	0.104329	606.156	0.102316	369.255	0.108008	214.114	0.111606	97.0477
	0.0999056	706.263	0.10699	597.236	0.104932	379.838	0.110753	218.508	0.114429	107.891
	0.102397	697.853	0.109637	637.04	0.107534	379.931	0.11348	220.656	0.117235	112.344
	0.104874	718.809	0.112267	627.66	0.11012	396.355	0.116191	235.936	0.120024	125.481
	0.107337	703.739	0.114882	663.386	0.112691	397.244	0.118885	240.18	0.122794	129.525
	0.109787	736.096	0.117482	655.491	0.115248	412.256	0.121563	412.256	0.125548	412.256
